# Supplementary material for: Laser-assisted surface alloying of titanium with silver to enhance antibacterial and bone-cell mineralization properties of orthopedic implants
Source: Royal Society of Chemistry journal article supplement (doi:10.1039/d3tb02481d), 2024-01-01
Supplement: d3tb02481d1.pdf [file d3tb02481d1.pdf]

## Supporting Information

Sotoudeh Sedaghat<sup>a,c</sup>, Akshay Krishnakumar<sup>b,c</sup>, Vidhya Selvamani<sup>a,c</sup>, James P. Barnard<sup>a</sup>, Sina Nejati<sup>a,c</sup>, Haiyan Wang<sup>a</sup>, David A. Detwiler<sup>b,d</sup>, Mohamed N. Seleem<sup>e</sup>, and Rahim Rahimi<sup>a,b,c\*</sup>

<sup>a</sup>*School of Materials Engineering, Purdue University, West Lafayette, IN 47907, USA*

<sup>b</sup>*Birck Nanotechnology Center, Purdue University, West Lafayette, IN 47907, USA*

<sup>c</sup>*School of Electrical and Computer Engineering, Purdue University, West Lafayette, IN 47907, USA*

<sup>d</sup>*Nanovis, West Lafayette, West Lafayette, IN 47907, USA*

<sup>e</sup>*Department of Biomedical Sciences and Pathobiology, Virginia Polytechnic Institute and State University, Blacksburg, VA, 24061, USA*

\* **Email:** rrahimi@purdue.edu

## Figures

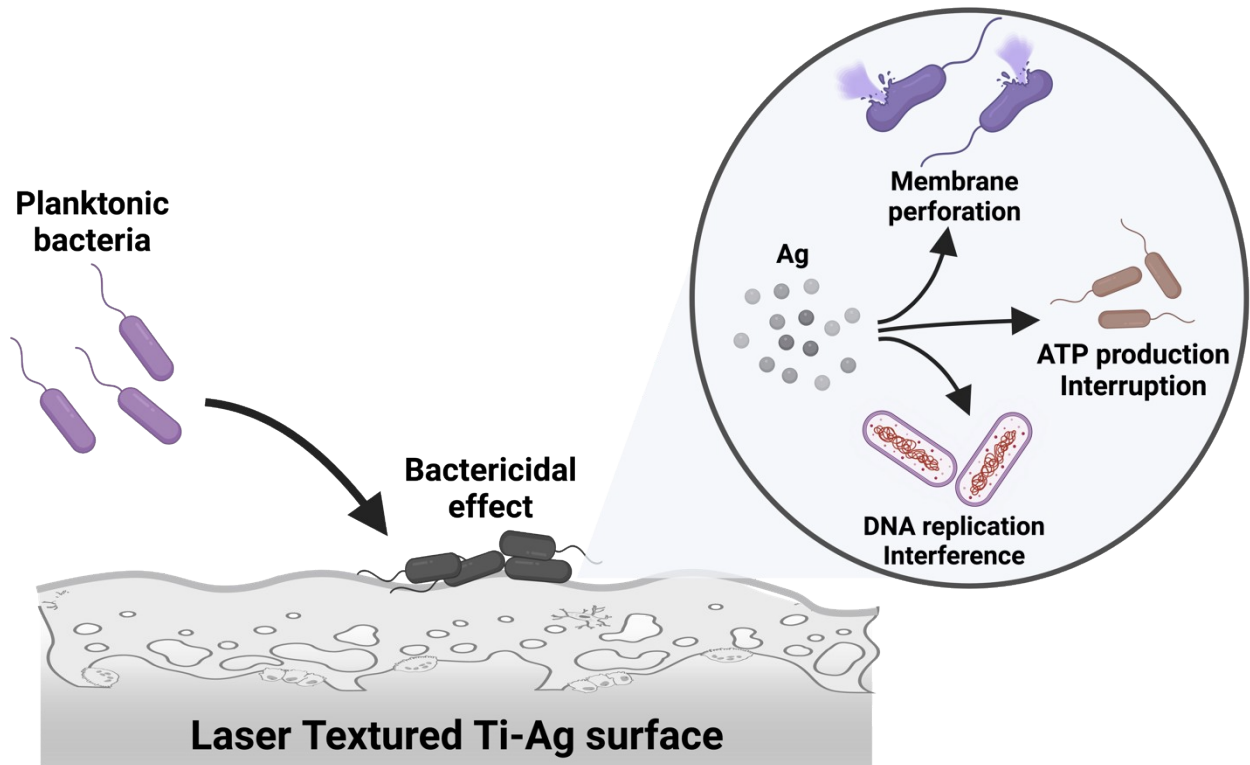

**Figure S1.** Antimicrobial mechanism of silver in the laser-modified titanium implant surface. The figure elucidates the various pathways by which silver disrupts/inhibits the bacterial attachment.



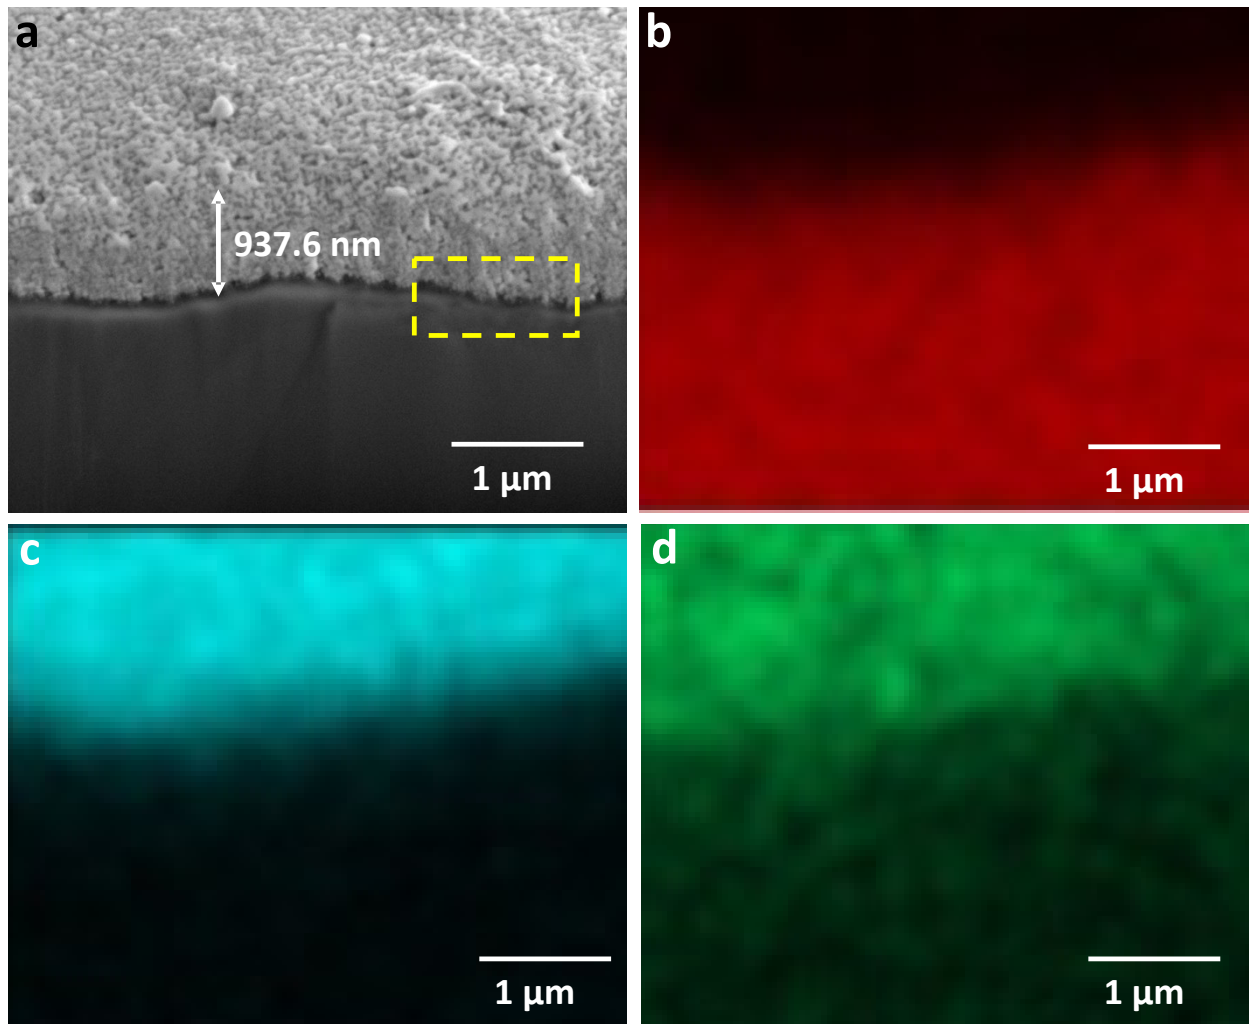

**Figure S2.** Surface characterization of the AgNPs spray coated onto titanium surface. (a) Cross-sectional view of the AgNPs spray coated surface, cross-sectional surface elemental mapping of (b) Ti, (c) Ag, and (d) C atoms.

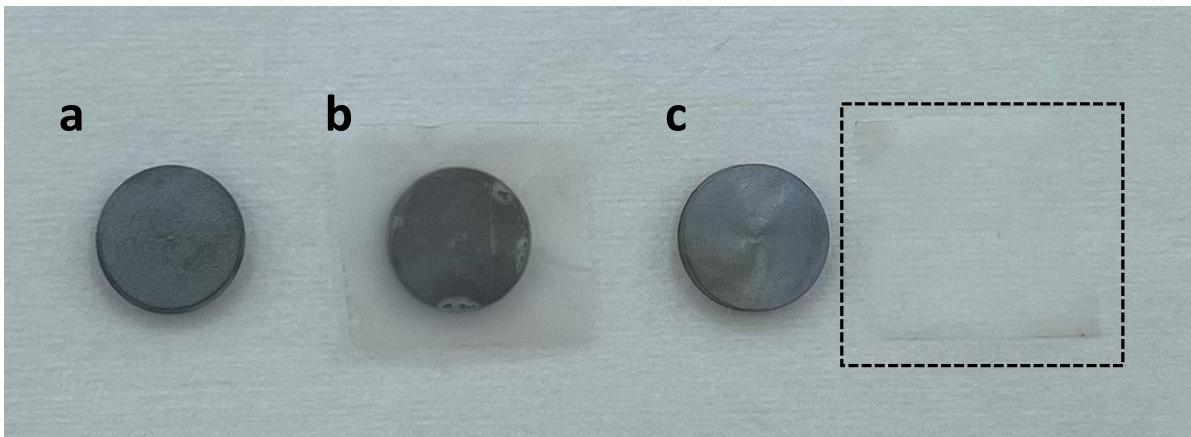

**Figure S3.** AgNPs adhesion test. Images showing the (a) Ag coated Ti specimen, (b) adhesive tape attachment, (c) Tape peeled off specimen with the scotch tape (dotted lines).

**Table S1.** Review of different strategies for laser-enabled integration of antibacterial silver composites on Ti<sub>6</sub>Al<sub>4</sub>V implant surfaces.

| <b>Base implant</b>                                         | <b>Antibacterial Composition</b> | <b>Surface modification Technique</b>                               | <b>Antibacterial Efficacy</b>                 | <b>Antibacterial Stability</b> | <b>Bio efficacy</b>                         | <b>Long term Biosafety</b> | <b>Mechanical properties</b>              | <b>Ref</b>      |
|-------------------------------------------------------------|----------------------------------|---------------------------------------------------------------------|-----------------------------------------------|--------------------------------|---------------------------------------------|----------------------------|-------------------------------------------|-----------------|
| <b>TiNi Plates</b>                                          | Ag powder in PVA solution        | Laser enabled surface alloying                                      | <i>S. aureus</i> and <i>E. coli</i>           | 3 days                         | N/A                                         | N/A                        | Increased surface hardness (109 %)        | 1               |
| <b>Selective laser melted Ti<sub>6</sub>Al<sub>4</sub>V</b> | AgNPs and ZnNPs                  | Laser 3D printing followed by Plasma electrolytic oxidation         | <i>MRSA</i>                                   | 1 day                          | Biocompatible with pre-osteoblasts          | 11 days                    | -                                         | 2               |
| <b>Ti<sub>6</sub>Al<sub>4</sub>V sheets</b>                 | TiN and Ag metal targets         | Antibacterial surface sputtering followed by laser texturing        | <i>S. aureus</i>                              | 1 day                          | Improved fibroblast cell adhesion           | 1 day                      | Increased surface roughness               | 3               |
| <b>3D printed porous Ti<sub>6</sub>Al<sub>4</sub>V</b>      | AgNO <sub>3</sub>                | Laser textured surface followed by dip-coating                      | <i>S. aureus</i> and <i>E. coli</i>           | 1 day                          | Improved pre-osteoblasts cell adhesion      | 5 days                     | Increased surface roughness               | 4               |
| <b>Commercial Ti<sub>6</sub>Al<sub>4</sub>V</b>             | Ag powder                        | Hot-pressing of powder followed by laser surface texturing          | <i>P. gingivalis</i> and <i>P. intermedia</i> | 3 days                         | N/A                                         | -                          | Increased surface roughness               | 5               |
| <b>Ti-20Zr-10Nb-4Ta alloy</b>                               | Ag foil                          | Physical foil pressing followed by Laser texturing                  | <i>S. aureus</i> and <i>E. coli</i>           | 1 day                          | Biocompatible with pre-osteoblasts          | 5 days                     | -                                         | 6               |
| <b>Commercial Ti<sub>6</sub>Al<sub>4</sub>V</b>             | Ag target                        | Silver Sputtering followed by laser surface texturing               | <i>S. aureus</i>                              | 1 day                          | Biocompatible with pre-osteoblasts          | 1 day                      | Microstructures surface                   | 7               |
| <b>N/A</b>                                                  | Ag and Ti powders                | Spraying followed by <i>in-situ</i> Laser bed fusion based alloying | <i>S. aureus</i>                              | 1 day                          | N/A                                         | -                          | Increased tensile strength                | 8               |
| <b>Commercial Ti<sub>6</sub>Al<sub>4</sub>V</b>             | <b>Ag ink</b>                    | <b>Ag spray coating followed by laser surface alloying</b>          | <b><i>S. aureus</i> and <i>E. coli</i></b>    | <b>12 days</b>                 | <b>Bone mineralization with osteoblasts</b> | <b>21 days</b>             | <b>Alloying and no increased hardness</b> | <b>Our work</b> |

## Reference:

- 1 Q. Qiao, V. A. M. Cristino, L. M. Tam, W. W. Chang, H. C. Qian, D. W. Zhang and C. T. Kwok, *Surf Coat Technol*, 2023, **474**, 130119.
- 2 I. A. J. van Hengel, N. E. Putra, M. W. A. M. Tierolf, M. Minneboo, A. C. Fluit, L. E. Fratila-Apachitei, I. Apachitei and A. A. Zadpoor, *Acta Biomater*, 2020, **107**, 325–337.
- 3 C. P. Priyanka, K. Keerthi Krishnan, U. Sudeep and K. K. Ramachandran, *Surf Coat Technol*, 2023, **474**, 130058.
- 4 Y. Jiao, X. Li, X. Zhang, G. Li, J. Fang, S. Xuan, L. Liu, S. Wang and H. Xie, *Appl Surf Sci*, 2023, **610**, 155519.
- 5 I. M. R. Gonçalves, E. R. Herrero, O. Carvalho, B. Henriques, F. S. Silva, W. Teughels and J. C. M. Souza, *J Biomed Mater Res B Appl Biomater*, 2021, **109**, 1588–1600.
- 6 X. Xue, L. Lu, D. He, Y. Guan and Y. Li, *Surf Coat Technol*, 2021, **425**, 127716.
- 7 F. Zou, S. Cao, Y. Luo, Z. Liu, X. Zhao, J. Hu, R. Liu, L. Cao, B. Liang, Z. Wang and Z. Weng, *Applied Physics A*, 2023, **129**, 797.
- 8 C. Song, Y. Chen, L. Liu, H. Lei, X. Yang, J. Hu, Q. Li, Y. Yang and Y. Li, *Mater Today Adv*, 2023, **20**, 100445.
